# Supplementary material
Source: publisher figshare collection journal article supplement (https://frontiersin.figshare.com/ndownloader/files/31546256)
Supplement: Supplementary file [file 31546256]

## Supplementary File 1

| Assay ID      | Gene Symbol | Dye     |                                   |
|---------------|-------------|---------|-----------------------------------|
| Hs04939142_m1 | BC039551    | VIC-MGB |                                   |
| Hs02786624_g1 | GAPDH       | JUN-QSY |                                   |
| Hs01394095_g1 | A2M-AS1     | ABY-QSY |                                   |
| Hs04274413_m1 | LNC00861    | FAM-MGB |                                   |
| ARRWGTF       | NR_034004   | FAM-MGB | Custom designed use NR_034004 seq |
| Hs04232660_s1 | SCARNA2     | FAM-MGB |                                   |
| Hs04976040_s1 | LINC01094   | FAM-MGB |                                   |
| Hs01065959_s1 | AL355711    | FAM-MGB |                                   |
